# Supplementary material for: A polymorphic (GA/CT)n- SSR influences promoter activity of Tryptophan decarboxylase gene in Catharanthus roseus L. Don
Source: PubMed Central journal article supplement (PMC5020687; doi:10.1038/srep33280), 2016-09-13

**Supplementary Information:**

**A polymorphic (GA/CT)*n*- SSR influences promoter activity of *Tryptophan decarboxylase* gene in *Catharanthus roseus* L. Don.**

**Santosh Kumar and Sabhyata Bhatia.**

## Supplementary Figure Legends

**Supplementary Figure 1.** Northern blot expression analysis of *Tdc* gene in the two *C. roseus* accessions, Kew1 and Prabal having (CT)<sub>8</sub> and (CT)<sub>21</sub> motifs respectively in the 5' UTR of *Tdc* gene. 10µg of total RNA was probed with cDNA. Ribosomal RNA was used as loading control.

**Supplementary Figure 2.** Nuclear run-on transcription to measure rate of *Tdc* gene transcription. PCR amplified DNA of *Tdc* (target gene), *Rps9* and SAND (positive control) and MATE (negative control) was blotted on to the nitrocellulose membrane and hybridized with the nascent UTP labeled run-on transcripts from Kew1 and Prabal.

**Supplementary Figure 1.**

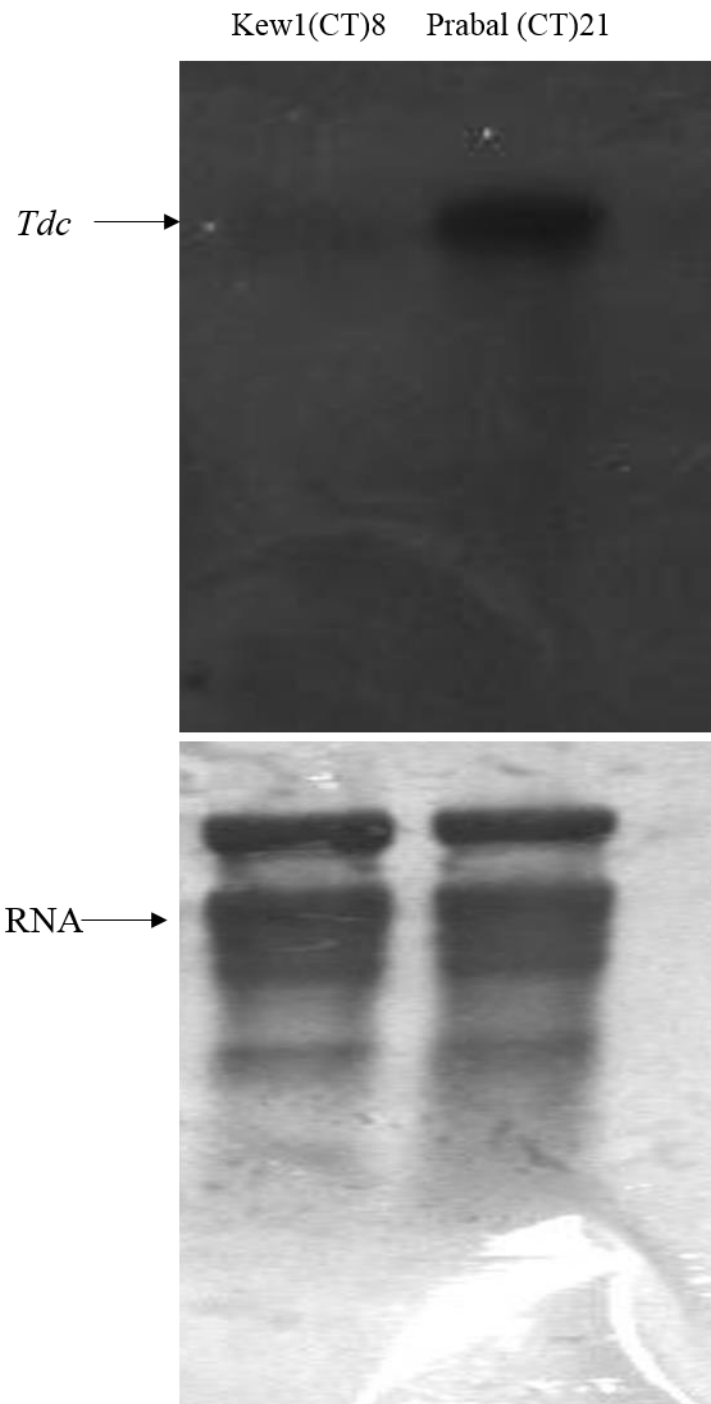

## Supplementary Figure 2.

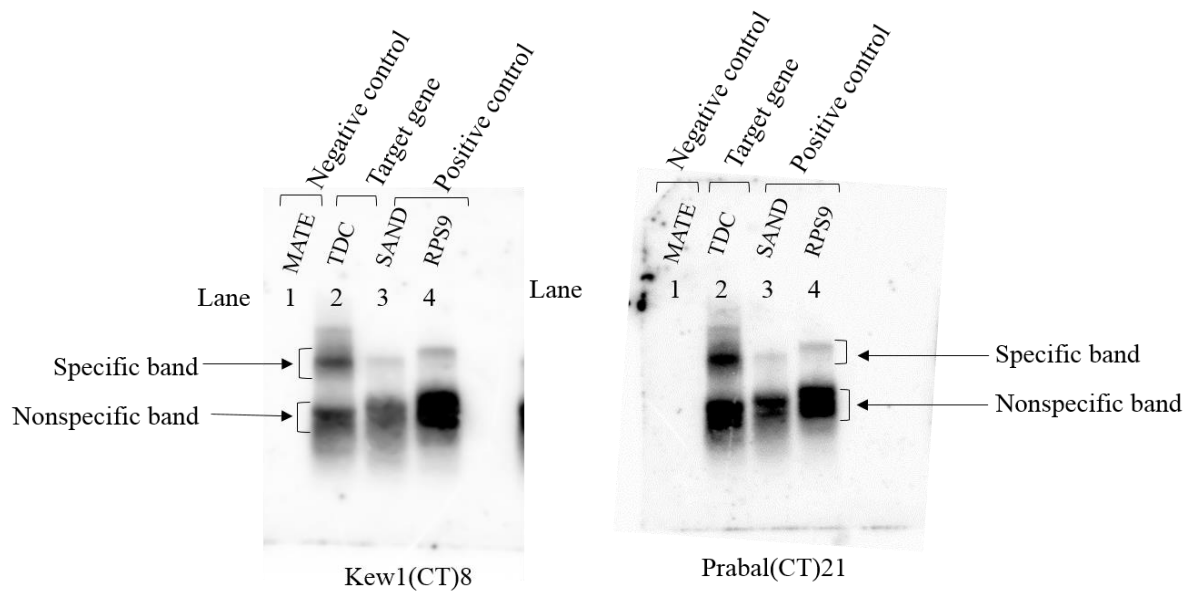

Supplement: srep33280-s1.pdf [file srep33280-s1.pdf]
